# Supplementary material for: The Liquid Biopsy Consortium: Challenges and opportunities for early cancer detection and monitoring
Source: PubMed Central journal article supplement — Cell Rep Med. 2023 Sep 15;4(10):101198. doi: 10.1016/j.xcrm.2023.101198 (PMC10591039; doi:10.1016/j.xcrm.2023.101198), 2023-09-15
Supplement: mmc1.pdf [file mmc1.pdf]

**Supplemental information**

**The Liquid Biopsy Consortium: Challenges  
and opportunities for early cancer  
detection and monitoring**

**Syeda Maheen Batool, Anudeep Yekula, Prerna Khanna, Tiffany Hsia, Austin S. Gamblin, Emil Ekanayake, Ana K. Escobedo, Dong Gil You, Cesar M. Castro, Hyungsoon Im, Tugba Kilic, Michelle Andrea Garlin, Johan Skog, Daniela M. Dinulescu, Jonathan Dudley, Nishant Agrawal, Jordan Cheng, Fereidoun Abtin, Denise R. Aberle, David Chia, David Elashoff, Tristan Grogan, Kostyantyn Krysan, Scott S. Oh, Charles Strom, Michael Tu, Fang Wei, Rena R. Xian, Steven J. Skates, David Y. Zhang, Thi Trinh, Mark Watson, Rebecca Aft, Siddarth Rawal, Ashutosh Agarwal, Susan B. Kesmodel, Changhui Yang, Cheng Shen, Fred H. Hochberg, David T.W. Wong, Abhijit A. Patel, Nickolas Papadopoulos, Chetan Bettegowda, Richard J. Cote, Sudhir Srivastava, Hakho Lee, Bob S. Carter, and Leonora Balaj**

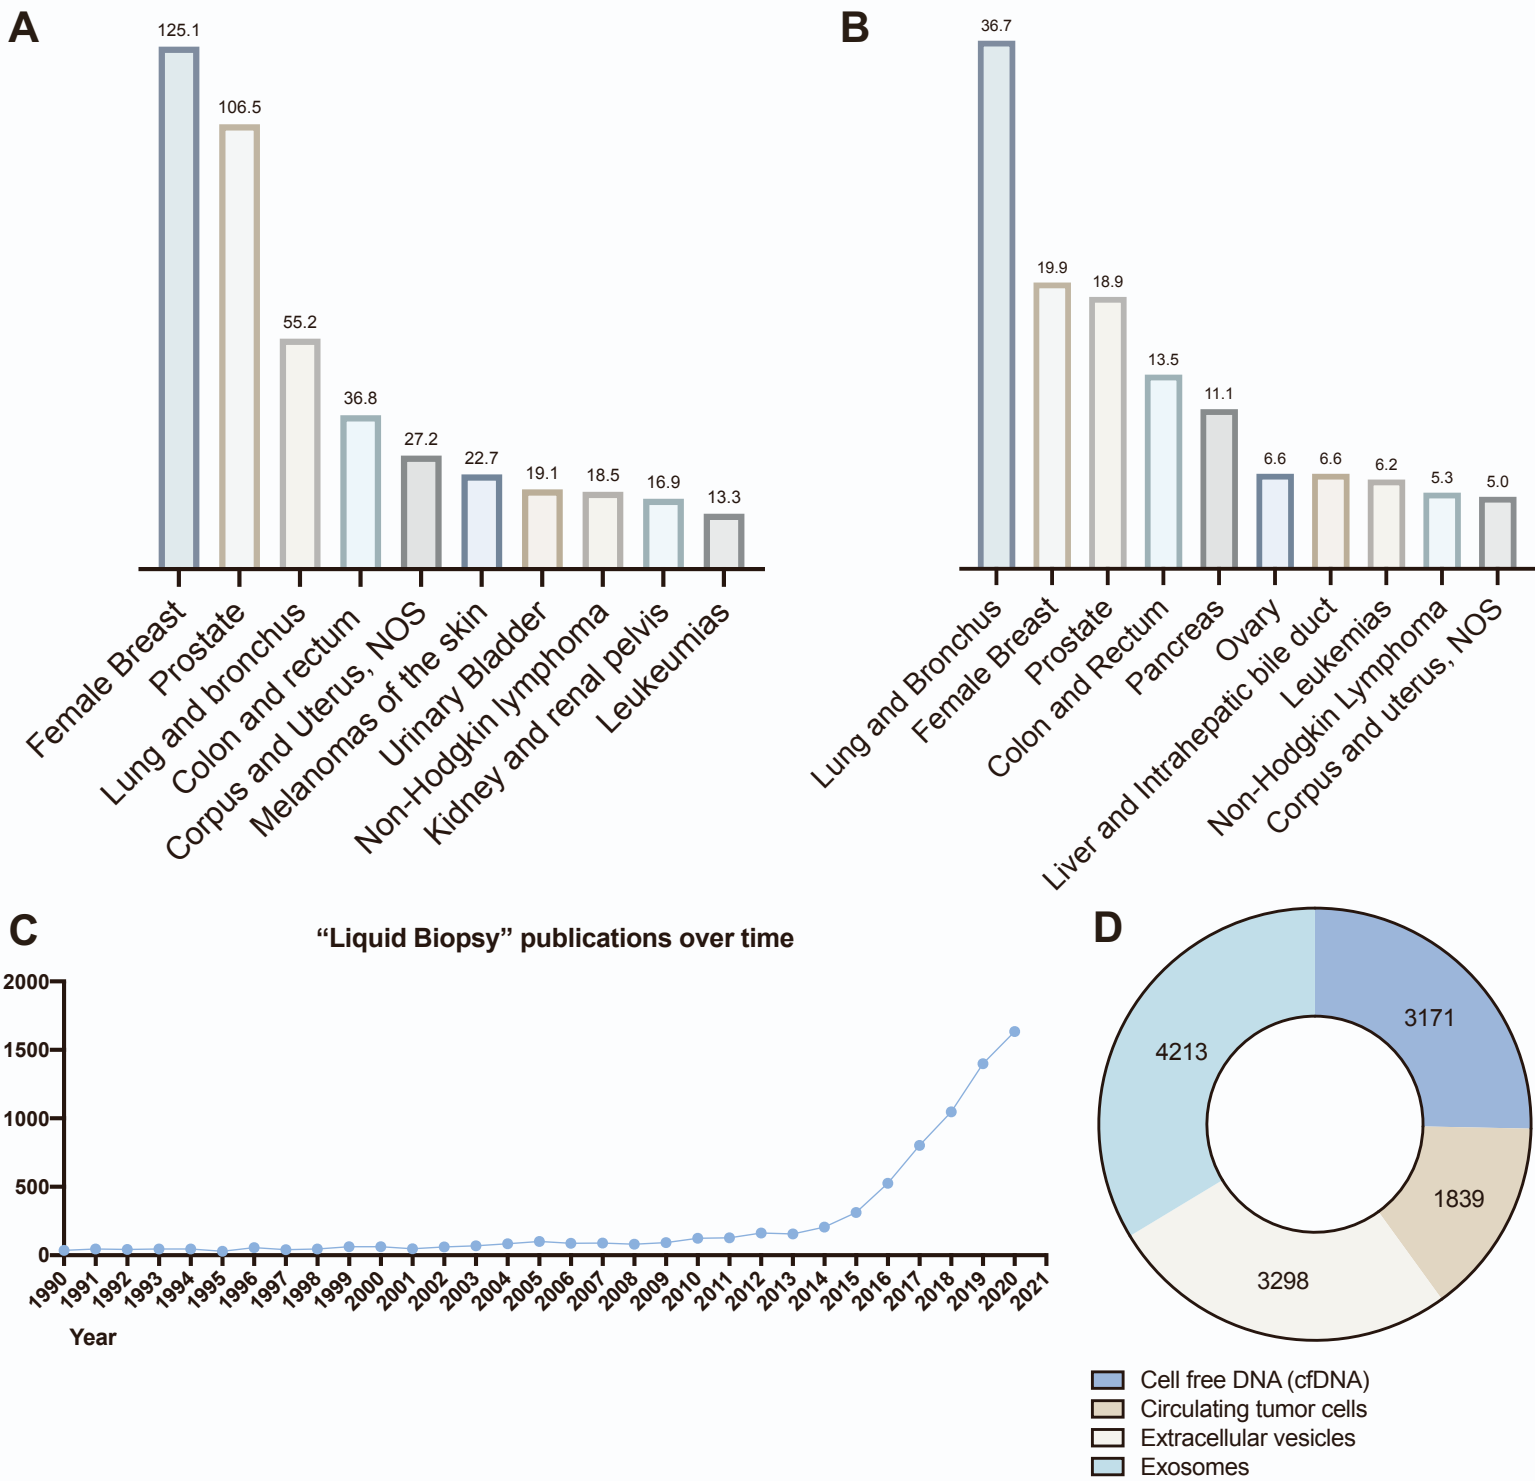

**Supplemental Figure 1.** Cancer by numbers. **A.** The incidence and **B.** the mortality of top cancers occurring across all races/ethnicities, male and female in the United States. The data are represented as rate per 100,000 people. Data Source- U.S. Cancer Statistics Working Group. U.S. Cancer Statistics Data Visualizations Tool, based on 2019 submission data (1999-2017): U.S. Department of Health and Human Services, Centers for Disease Control and Prevention and National Cancer Institute; [www.cdc.gov/cancer/dataviz](http://www.cdc.gov/cancer/dataviz), released in June 2020. **C.** "Liquid biopsy" publications, with an increasing interest over time. **D.** Individual terms of liquid biopsy registered publications in 2020.

Supplementary Table 1. An overview of studies investigating the clinical utility of multiple liquid biopsy analytes in combination and individually.

| Analyte Isolated                    | Disease                            | Biofluid      | Isolation Method                                                                | Platform for biomarker detection | Biomarker                   | Sensitivity & Specificity                                  | Clinical utility                                                                                                                | Advantages                                                                                                                                                                              | Disadvantages                                                                                           | Reference |
|-------------------------------------|------------------------------------|---------------|---------------------------------------------------------------------------------|----------------------------------|-----------------------------|------------------------------------------------------------|---------------------------------------------------------------------------------------------------------------------------------|-----------------------------------------------------------------------------------------------------------------------------------------------------------------------------------------|---------------------------------------------------------------------------------------------------------|-----------|
| EV RNA/DNA + cfDNA (ExoNA)          | Non-small cell lung cancer (NSCLC) | Plasma        | Exolution <sup>T</sup> <sub>M</sub> plus                                        | qPCR                             | EGFR variants: L858R, T790M | Sensitivity: 90% (L858R), 83% (T790M)<br>Specificity: 100% | <ul style="list-style-type: none"> <li>•Diagnosis</li> <li>•Monitoring</li> <li>•Surveillance</li> </ul>                        | ExoNA vs cfDNA is associated with higher sensitivity of rare mutation detection<br>cfDNA released from dying cells<br>EVs are released as an active metabolic process from living cells | Low amounts of analyte in early stage disease.<br>Effect of sampling noise                              | 1         |
| EV RNA/DNA + cfDNA (ExoNA)          | Glioma                             | Plasma        | Exolution <sup>T</sup> <sub>M</sub> plus                                        | ddPCR                            | TERC228T, TERC250T          | Sensitivity, 72%<br>Specificity, 90%                       | <ul style="list-style-type: none"> <li>•Diagnosis</li> <li>•Monitoring</li> <li>•Surveillance</li> </ul>                        | -                                                                                                                                                                                       | -                                                                                                       | 1,2       |
| EV RNA/DNA + cfDNA (ExoNA)          | Melanoma                           | Plasma        | Exolution <sup>T</sup> <sub>M</sub> plus                                        | qPCR                             | BRAF V600E/K                | Sensitivity, 50%<br>Specificity, 73%                       | <ul style="list-style-type: none"> <li>•Diagnosis</li> <li>•Prediction of worsening prognosis in &lt;2 years</li> </ul>         | Minimizes false negatives secondary to tissue heterogeneity                                                                                                                             | -                                                                                                       | 3         |
| EV DNA vs ctDNA vs (EV DNA + cfDNA) | Melanoma                           | Plasma        | Peptide-based affinity isolation                                                | qPCR                             |                             | Sensitivity, 56%<br>Specificity, 87%                       | <ul style="list-style-type: none"> <li>•Diagnosis</li> <li>•Prognostication (OS, PFS)</li> <li>•Treatment monitoring</li> </ul> | Two-fold higher recovery of mutant signal vs ultracentrifugation.<br>Higher sensitivity in low concentration samples                                                                    | Low diagnostic accuracy<br>Need for clinical studies with more wild-type cohorts                        | 4         |
| EV DNA vs cfDNA                     | Colon cancer                       | Serum, Plasma | Invitrogen Total Exosome Isolation MagMAX <sup>TM</sup> Cell Free DNA Isolation | Next Generation Sequencing       | APC, TP53, KRAS, PIK3CA     | Sensitivity: EV DNA (61.90%)<br>cfDNA (66.67%)             | <ul style="list-style-type: none"> <li>•Diagnosis</li> <li>•Prognostication</li> </ul>                                          | High sensitivity in late stage (III-IV) disease.<br>Correlation of circulating mutant DNA levels                                                                                        | Low mutation detection in early stage (I-II) disease<br>Limited coverage of small fragments of cfDNA of | 5         |

|                                        |                               |               |                                                                    |                                                                  |                |                                                                                                                                |                                                                                                                                                                 |                                                                                                                          |                                                                                                                           |      |
|----------------------------------------|-------------------------------|---------------|--------------------------------------------------------------------|------------------------------------------------------------------|----------------|--------------------------------------------------------------------------------------------------------------------------------|-----------------------------------------------------------------------------------------------------------------------------------------------------------------|--------------------------------------------------------------------------------------------------------------------------|---------------------------------------------------------------------------------------------------------------------------|------|
|                                        |                               |               |                                                                    |                                                                  |                |                                                                                                                                |                                                                                                                                                                 | to clinical features (tumor size)                                                                                        | varying sizes                                                                                                             |      |
| EV DNA vs cfDNA                        | Pancreatic adenocarcinoma     | Plasma        | Serial ultracentrifugation QIAmp Circulating Nucleic Acid Kit      | ddPCR                                                            | KRAS           | Localized: (EV DNA 66.7%, cfDNA 45.5%)<br>Locally advanced: (EV DNA 80%, cfDNA 30.8%)<br>Metastatic: (EV DNA 85%, cfDNA 57.9%) | <ul style="list-style-type: none"> <li>•Early diagnosis</li> <li>•Disease monitoring</li> <li>•Determination of survival benefit following resection</li> </ul> | Higher sensitivity of KRAS detection in early-stage disease using EV DNA<br>Association with disease free survival       | Need for larger studies<br>High background in healthy controls- biological role of background oncogenic mutations unclear | 6    |
| ctDNA in EV depleted plasma            | Small cell lung cancer (SCLC) | Plasma        | Sequential Centrifugation (Fractionated Method) DNA Blood Mini Kit | Whole Genome Sequencing PCR                                      | EGFR mutations | Whole Plasma : 10/22<br>EV depleted Plasma : 14/22                                                                             | <ul style="list-style-type: none"> <li>•Diagnosis</li> <li>•Prognostication</li> <li>•Monitoring</li> </ul>                                                     | Improved method of mutant ctDNA detection<br>Preferential enrichment of smaller size fragments                           | Limited understanding of the evolving ctDNA content in different plasma fractions in serially collected samples           | 7    |
| EVs vs Tumor educated platelets (TEPs) | Melanoma                      | Blood         | Centrifugation ExoRNasy Plasma Isolation                           | ARMS RT-qPCR                                                     | BRAF V600E     | EV Fraction, 10/12<br>Platelets, 0/12                                                                                          | <ul style="list-style-type: none"> <li>•Diagnosis</li> <li>•Disease Monitoring</li> </ul>                                                                       | Highly sensitive detection of rare events using EV fraction                                                              | Higher wild-type background with the use of platelets<br>Mutant RNA transfer to platelets below the limit of detection    | 7,8  |
| Urine EVs vs Platelet EVs              | Prostate                      | Urine & Blood | Differential Centrifugation                                        | Ultra-Performance Liquid Chromatography-Tandem Mass Spectrometry | Metabolomics   | --                                                                                                                             | <ul style="list-style-type: none"> <li>•Disease monitoring</li> </ul>                                                                                           | Amplified detection of cancer-related changes<br>Increased detection of unique metabolites in urine EVs and platelet EVs | Availability of technology for quantification                                                                             | 9    |
| Plasma EVs/Serum EVs/Whole blood       | Healthy                       | Blood         | Differential Centrifugation                                        | Small RNA deep sequencing                                        | miRNA          | --                                                                                                                             | <ul style="list-style-type: none"> <li>•Diagnosis</li> <li>•Disease Monitoring</li> </ul>                                                                       | Enrichment of miRNAs in EVs                                                                                              | Larger validation studies required                                                                                        | 9,10 |

## References

1. Castellanos-Rizaldos, E., Zhang, X., Tadigotla, V.R., Grimm, D.G., Karlovich, C., Raez, L.E., and Skog, J.K. (2019). Exosome-based detection of activating and resistance mutations from plasma of non-small cell lung cancer patients. *Oncotarget* *10*, 2911–2920. 10.18632/oncotarget.26885.
2. Muralidharan, K., Yekula, A., Small, J.L., Rosh, Z.S., Kang, K.M., Wang, L., Lau, S., Zhang, H., Lee, H., Bettegowda, C., et al. (2021). Promoter Mutation Analysis for Blood-Based Diagnosis and Monitoring of Gliomas. *Clin. Cancer Res.* *27*, 169–178. 10.1158/1078-0432.CCR-20-3083.
3. García-Silva, S., Vico-Alonso, C., Meyer, L., Enderle, D., Sanchez, J.A., Onteniente, M.D.M., Noerholm, M., Skog, J., Rodríguez-Peralto, J.-L., Ortiz-Romero, P.-L., et al. (2023). Improved Sensitivity in BRAFV600E Detection in Combined Tissue and Extracellular Vesicle-Based Liquid Biopsy in Melanoma. *J. Invest. Dermatol.* 10.1016/j.jid.2023.01.025.
4. Zocco, D., Bernardi, S., Novelli, M., Astrua, C., Fava, P., Zarovni, N., Carpi, F.M., Bianciardi, L., Malavenda, O., Quaglino, P., et al. (2020). Isolation of extracellular vesicles improves the detection of mutant DNA from plasma of metastatic melanoma patients. *Sci. Rep.* *10*, 15745. 10.1038/s41598-020-72834-6.
5. Thakur, K., Singh, M.S., Feldstein-Davydova, S., Hannes, V., Hershkovitz, D., and Tsuriel, S. (2021). Extracellular Vesicle-Derived DNA vs. CfDNA as a Biomarker for the Detection of Colon Cancer. *Genes* *12*. 10.3390/genes12081171.
6. Allenson, K., Castillo, J., San Lucas, F.A., Scelo, G., Kim, D.U., Bernard, V., Davis, G., Kumar, T., Katz, M., Overman, M.J., et al. (2017). High prevalence of mutant KRAS in circulating exosome-derived DNA from early-stage pancreatic cancer patients. *Ann. Oncol.* *28*, 741–747. 10.1093/annonc/mdx004.
7. Sun, L., Du, M., Kohli, M., Huang, C.-C., Chen, X., Xu, M., Shen, H., Wang, S., and Wang, L. (2021). An Improved Detection of Circulating Tumor DNA in Extracellular Vesicles-Depleted Plasma. *Front. Oncol.* *11*, 691798. 10.3389/fonc.2021.691798.
8. Brinkman, K., Meyer, L., Bickel, A., Enderle, D., Berking, C., Skog, J., and Noerholm, M. (2020). Extracellular vesicles from plasma have higher tumour RNA fraction than platelets. *J Extracell Vesicles* *9*, 1741176. 10.1080/20013078.2020.1741176.
9. Puhka, M., Takatalo, M., Nordberg, M.-E., Valkonen, S., Nandania, J., Aatonen, M., Yliperttula, M., Laitinen, S., Velagapudi, V., Mirtti, T., et al. (2017). Metabolomic Profiling of Extracellular Vesicles and Alternative Normalization Methods Reveal Enriched Metabolites and Strategies to Study Prostate Cancer-Related Changes. *Theranostics* *7*, 3824–3841. 10.7150/thno.19890.
10. Cheng, L., Sharples, R.A., Scicluna, B.J., and Hill, A.F. (2014). Exosomes provide a protective and enriched source of miRNA for biomarker profiling compared to intracellular and cell-free blood. *J Extracell Vesicles* *3*. 10.3402/jev.v3.23743.
